# Supplementary material for: Versatile composite hydrogels for drug delivery and beyond
Source: Royal Society of Chemistry journal article supplement (doi:10.1039/d0tb01360a), 2020-01-01
Supplement: d0tb01360a1.pdf [file d0tb01360a1.pdf]

## Electronic Supplementary Information (ESI)

### **Versatile composite hydrogels for drug delivery and beyond**

Yi-Hua Chiang, Meng-Ju Wu, Wei-Chin Hsu, Teh-Min Hu\*

*Faculty of Pharmacy & Center for Advanced Pharmaceutics and Drug Delivery Research  
& One Health Research Center, National Yang-Ming University, Taipei 112, Taiwan.*

*Correspondence: [tehmin@ym.edu.tw](mailto:tehmin@ym.edu.tw)*

**Table S1.** Atomic distribution of various elements on the surfaces of freeze-dried gels prepared with 5% BSA, 120 mM Na<sub>2</sub>HPO<sub>4</sub> and different compositions of MPMDMS and MPTMS.

| Elements | atomic %      |                               |              |
|----------|---------------|-------------------------------|--------------|
|          | 120 mM MPMDMS | 60 mM MPTMS +<br>60 mM MPMDMS | 120 mM MPTMS |
| C        | 63.3%         | 54.5%                         | 52.4%        |
| O        | 17.4%         | 25.7%                         | 24.7%        |
| N        | 5.44%         | 6.39%                         | 6.42%        |
| S        | 4.38%         | 2.74%                         | 2.03%        |
| Si       | 3.47%         | 1.98%                         | 0.94%        |
| Na       | 3.47%         | 5.48%                         | 7.36%        |
| P        | 2.57%         | 3.20%                         | 6.10%        |

**Table S2.** <sup>29</sup>Si NMR chemical shifts and assignments for gels with different silane compositions

| Silane Composition         | <i>Si</i> species | ppm   | %    |
|----------------------------|-------------------|-------|------|
| 120 mM MPMDMS              | D1                | -14.0 | 26.2 |
|                            | D2                | -22.2 | 73.8 |
| 90 mM MPMDMS + 30mM MPTMS  | D1                | -14.2 | 28.1 |
|                            | D2                | -21.7 | 48.4 |
|                            | T2                | -59.0 | 6.5  |
|                            | T3                | -68.1 | 11.3 |
| 60 mM MPMDMS + 60mM MPTMS  | D1                | -13.0 | 30.4 |
|                            | D2                | -21.2 | 30.1 |
|                            | T2                | -58.5 | 8.5  |
|                            | T3                | -68.2 | 25.8 |
| 30 mM MPMDMS + 90 mM MPTMS | D1                | -13.6 | 15.4 |
|                            | D2                | -22.2 | 16.5 |
|                            | T2                | -59.3 | 21.8 |
|                            | T3                | -68.8 | 46.3 |
| 120 mM MPTMS               | T2                | -58.2 | 34.2 |
|                            | T3                | -67.5 | 65.8 |
